# Supplementary material for: Measuring the classroom level of the Dynamic Model of Educational Effectiveness through teacher self-report: development and validation of a new instrument
Source: Frontiers journal article supplement (doi:10.3389/feduc.2023.1281431), 2023-10-19
Supplement: Table_1.docx [file Table_1.docx]

**Supplementary material**

**Table S1**

*Items of the teacher self-report for measuring the classroom-level of the DMEE and descriptive statistics*

| Items in French and their English translation | | n | 1 | 2 | 3 | 4 | 5 | 6 | 7 |
| --- | --- | --- | --- | --- | --- | --- | --- | --- | --- |
| *Orientation* | | | | | | | | | |
| 1 | Je présente explicitement aux élèves les objectifs d’apprentissage au début de la leçon/activité.  **I explicitly present the learning objectives to the students at the beginning of the lesson/activity.** | 998 | 2.8 | 11.3 | 19.9 | 24.2 | 16.5 | 12.5 | 12.6 |
| 2 | Au cours de la leçon/activité, j’explique à quoi sert chaque tâche que je propose.  **During the lesson/activity, I explain the purpose of each task I propose.** | 300 | .7 | 5.3 | 19.0 | 26.0 | 21.7 | 18.0 | 9.3 |
| 3 | Je vérifie que les élèves comprennent bien la signification et l’intérêt des leçons/activités que je propose.  **I check that the students understand the meaning and interest of the lessons/activities I propose.** | 316 | .3 | 1.9 | 11.1 | 19.9 | 20.3 | 24.4 | 22.2 |
| 4 | J’interroge les élèves sur leur perception des raisons pour lesquelles les leçons/activités sont proposées.  **I ask the students about their perception of the reasons why the lessons/activities are proposed.** | 968 | 7.0 | 17.6 | 27.8 | 22.2 | 12.7 | 8.6 | 4.1 |
| 5 | Les élèves connaissent la finalité ou l'objectif de la leçon/activité en cours.  **Students know the purpose or objective of the lesson/activity in progress.** | 997 | 1.5 | 5.1 | 15.9 | 27.6 | 22.3 | 16.2 | 11.3 |
| 6 | Les élèves savent pourquoi ils font telle ou telle activité.  **Students know why they are doing a particular activity.** | 301 | .3 | 2.0 | 12.3 | 22.3 | 28.9 | 22.3 | 12.0 |
| 7 | Les élèves comprennent pourquoi ils sont en train de réaliser une tâche spécifique.  **Students understand why they are doing a specific task.** | 297 | .7 | 1.7 | 12.8 | 22.2 | 35.0 | 18.5 | 9.1 |
| 8 | Je modifie les objectifs et les attentes pour les élèves en difficulté.  **I modify goals and expectations for students with difficulties.** | 1259 | 2.8 | 11.3 | 19.9 | 24.2 | 16.5 | 12.5 | 12.6 |
| *Structuration* | | | | | | | | | |
| 9 | En début de leçon/activité, je fais un bref résumé/rappel de la leçon/activité précédente.  **At the start of each lesson/activity, I give a brief summary/review of the previous lesson/activity.** | 1010 | .9 | 3.7 | 20.8 | 24.4 | 17.5 | 18.9 | 13.9 |
| 10 | Je fais des liens entre les différentes activités que je propose aux élèves.  **I make links between the different activities I propose to the students.** | 320 | .3 | 1.9 | 9.4 | 21.3 | 24.1 | 25.0 | 18.1 |
| 11 | J’attire l’attention des élèves sur les éléments principaux de la leçon/activité.  **I draw the students' attention to the main points of the lesson/activity.** | 321 | .0 | .3 | 4.4 | 18.4 | 23.7 | 25.9 | 27.4 |
| 12 | En fin de leçon/activité, je fais un résumé de ce qui a été vu/travaillé.  **At the end of the lesson/activity, I summarise what has been seen/worked on.** | 1010 | 1.8 | 9.5 | 24.9 | 25.7 | 18.3 | 13.5 | 6.3 |
| 13 | Les élèves font des liens entre la leçon/activité en cours et d'autres leçons/activités précédentes.  **The students make links between the lesson/activity in progress and other previous lessons/activities.** | 975 | .7 | 4.6 | 19.7 | 27.1 | 25.5 | 16.4 | 5.9 |
| 14 | Les élèves sont capables de réexpliquer ce qui s'est passé lors de la leçon/activité précédente.  **Students are able to explain what happened in the previous lesson/activity.** | 315 | .0 | 1.9 | 13.0 | 25.4 | 32.4 | 20.0 | 7.3 |
| 15 | En fin de leçon/activité, les élèves font un résumé de ce qui a été vu/travaillé.  **At the end of the lesson/activity, the students summarise what they have seen/worked on.** | 298 | 5.0 | 19.8 | 35.9 | 20.5 | 11.1 | 6.0 | 1.7 |
| 16 | J'ajuste la quantité de travail aux capacités des élèves.  **I adjust the amount of work required in accordance with students' capabilities.** | 1261 | .2 | .5 | 6.6 | 21.3 | 17.9 | 20.9 | 32.7 |
| 17 | Je prévois des tâches différentes en fonction des capacités des élèves.  **I plan different assignments to match students’ abilities.** | 1265 | .3 | 2.1 | 1.8 | 23.3 | 18.7 | 19.3 | 25.5 |
| *Questioning* | | | | | | | | | |
| 18 | Je pose des questions orales collectives (adressées à l'ensemble de la classe).  **I ask group oral questions (addressed to the whole class).** | 1029 | .0 | .4 | 4.1 | 19.4 | 19.9 | 28.5 | 27.7 |
| 19 | Je pose des questions orales individuelles (adressées spécifiquement à certains élèves).  **I ask individual oral questions (addressed specifically to certain students).** | 1036 | .3 | 1.2 | 8.4 | 22.1 | 23.1 | 25.1 | 19.9 |
| 20 | Je pose des questions par écrit.  **I ask written questions.** | 277 | 9.4 | 14.8 | 23.1 | 20.9 | 16.6 | 9.4 | 5.8 |
| 21 | Je pose des questions ouvertes qui demandent une réponse argumentée/élaborée.  **I ask open questions that require a developed/elaborated response.** | 1013 | .1 | 2.6 | 13.2 | 25.0 | 24.3 | 22.2 | 12.6 |
| 22 | Les questions que je pose sont comprises par les élèves.  **The questions I ask are understood by the students.** | 317 | .0 | .3 | 1.9 | 18.6 | 32.2 | 33.8 | 13.2 |
| 23 | Les élèves répondent correctement aux questions que je leur pose individuellement.  **Students respond correctly to the questions I ask them individually.** | 308 | .0 | .6 | 12.0 | 33.1 | 36.0 | 14.3 | 3.9 |
| 24 | Les élèves veulent répondre lorsque je pose une question collective à la classe.  **Students want to answer when I ask the class a collective question.** | 322 | .0 | .0 | 2.8 | 9.9 | 20.5 | 36.3 | 30.4 |
| *Modeling* | | | | | | | | | |
| 25 | J’explique des stratégies et des procédures aux élèves, puis je leur demande de les mettre en œuvre.  **I explain strategies and procedures to students and then ask them to apply them.** | 1016 | .5 | 1.8 | 8.4 | 23.0 | 24.1 | 24.3 | 17.9 |
| 26 | Lorsqu’un élève éprouve une difficulté particulière lors d’un exercice, je lui montre la bonne stratégie ou procédure à utiliser.  **If a student is having particular difficulty with an exercise, I show him/her the correct strategy or procedure to use.** | 326 | .0 | .6 | 4.0 | 14.7 | 19.0 | 26.7 | 35.0 |
| 27 | Pour réaliser un exercice ou résoudre une situation-problème, je demande aux élèves d’utiliser les stratégies et procédures que j’ai montrées.  **To complete an exercise or solve a problem, I ask the students to use the strategies and procedures I have shown them.** | 311 | .3 | 1.3 | 9.0 | 23.5 | 27.0 | 21.9 | 17.0 |
| 28 | Face à un exercice ou une situation-problème, les élèves proposent leurs propres stratégies ou procédures de résolution.  **When faced with an exercise or a problem, the students come up with their own strategies or procedures for solving it.** | 1003 | .7 | 2.6 | 14.6 | 24.7 | 23.5 | 21.3 | 12.6 |
| 29 | Face à un exercice ou une situation-problème, les élèves appliquent correctement les stratégies et procédures que je leur ai montrées.  **When faced with an exercise or problem situation, the students correctly apply the strategies and procedures I have shown them.** | 990 | .4 | 2.0 | 15.1 | 32.1 | 29.8 | 16.1 | 4.5 |
| 30 | Les élèves comprennent aisément les stratégies et procédures que je leur explique.  **The students easily understand the strategies and procedures I explain to them.** | 308 | .0 | 1.3 | 7.1 | 30.5 | 31.2 | 25.3 | 4.5 |
| *Application* | | | | | | | | | |
| 31 | Je donne par écrit des exercices d'application à faire individuellement.  **I give written application exercises to be done individually.** | 886 | 7.4 | 3.2 | 9.4 | 20.4 | 23.1 | 20.4 | 16.0 |
| 32 | Je donne par écrit des exercices d'application à faire en duo.  **I give you written exercises to do in pairs.** | 283 | 6.0 | 6.4 | 2.1 | 24.4 | 21.2 | 15.2 | 6.7 |
| 33 | Je donne par écrit des exercices d'application à faire en groupes.  **I give written exercises to be done in groups.** | 277 | 6.1 | 7.2 | 24.2 | 22.7 | 19.5 | 14.1 | 6.1 |
| 34 | Je donne oralement des exercices d'application de ce qui vient d'être enseigné.  **I give oral exercises to apply what has just been taught.** | 293 | .7 | 5.1 | 14.7 | 25.9 | 22.2 | 20.5 | 10.9 |
| 35 | Les exercices d'application que je donne sont spécifiques (ils visent une habileté ou un type de tâche en particulier).  **The exercises I give are specific (they target a particular skill or type of task).** | 934 | .5 | 1.3 | 10.3 | 26.0 | 24.9 | 22.5 | 14.5 |
| 36 | Les exercices d'application que je donne impliquent l'intégration de plusieurs habiletés.  **The exercises I give involve the integration of several skills.** | 944 | .6 | 1.4 | 11.5 | 28.3 | 26.9 | 21.3 | 10.0 |
| 37 | Les exercices que je donne sont corrigés collectivement en classe ou par mes soins pendant ou après l'école.  **The exercises I give are corrected collectively in class or by myself during or after school.** | 290 | 1.0 | 1.0 | 4.1 | 9.7 | 6.9 | 14.5 | 62.8 |
| 38 | Je varie la complexité des tâches en fonction des capacités des élèves (par exemple : porter un jugement sur un texte, le résumer, reconnaître le thème principal).  **I vary the complexity of assignments to match students’ abilities (e.g. make judgments about a text or summarize, recognize the main theme).** | 1187 | .6 | 1.9 | 10.0 | 23.7 | 20.6 | 21.4 | 21.8 |
| *Learning environment* | | | | | | | | | |
| 39 | Je veille à ce que chaque élève participe à la leçon/activité.  **I make sure that every pupil participates in the lesson/activity.** | 1037 | .1 | .0 | .6 | 11.0 | 15.7 | 21.4 | 51.2 |
| 40 | Je donne des feedbacks positifs aux élèves.  **I give positive feedback to the students.** | 1047 | .1 | .0 | 1.1 | 8.8 | 16.2 | 25.5 | 48.2 |
| 41 | L’ambiance de travail en classe est calme et sereine.  **The classroom atmosphere is calm and serene.** | 1038 | .3 | 3.1 | 8.4 | 19.0 | 23.7 | 29.5 | 16.1 |
| 42 | J’encourage les élèves à me dire lorsqu’ils ne comprennent pas quelque chose.  **I encourage students to tell me when they don't understand something.** | 326 | .0 | .0 | 1.5 | 5.8 | 12.3 | 18.4 | 62.0 |
| 43 | J'utilise du matériel alternatif pour correspondre aux niveaux de compétences des élèves (par exemple, des livres adaptés aux besoins des élèves de niveau de compétences inférieur ou supérieur).  **I use alternative materials to match students’ abilities (e.g. books adapted to the needs of lower and higher skill levels).** | 1234 | .8 | 3.2 | 12.5 | 21.2 | 17.5 | 19.5 | 25.4 |
| 44 | Je fournis aux élèves les plus faibles des aides et des outils supplémentaires (par exemple des supports visuels contenant les informations essentielles).  **I provide weaker students with additional aids and tools (e.g. visual aids containing essential information).** | 1257 | .2 | 1.2 | 7.2 | 21.7 | 16.6 | 22.0 | 31.1 |
| *Assessment* |  |  |  |  |  |  |  |  |  |
| 45 | Mes évaluations sont réellement formatives pour les élèves.  **My assessments are truly formative for the students.** | 1158 | .5 | 2.4 | 13.7 | 26.9 | 26.3 | 16.9 | 13.1 |
| 46 | J'analyse les erreurs les plus fréquemment commises lors des évaluations afin d'identifier précisément ce qui doit être travaillé en priorité avec tous les élèves ou certains d'entre eux.  **I analyze the most common mistakes made during assessments in order to identify precisely what needs to be worked on as a priority with all or some of the students.** | 1312 | .4 | 2.2 | 6.9 | 24.5 | 21.6 | 18.7 | 25.7 |
| 47 | J'observe les élèves pendant qu'ils effectuent une tâche particulière en classe et je leur donne un retour direct sur leur travail.  **I observe the students while they are doing a particular task in class and give them direct feedback on their work.** | 1390 | .1 | .5 | 5.5 | 18.0 | 19.1 | 22.5 | 34.2 |
| 48 | Après chaque évaluation, je donne un feedback aux élèves sur les aspects qu'ils ont bien maîtrisés et sur ceux pour lesquels ils doivent faire des efforts supplémentaires.  **After each assessment, I provide feedback to the students on which aspects they have mastered well and on which aspects they need to make further efforts.** | 1314 | 1.2 | 3.4 | 11.6 | 22.6 | 18.2 | 16.1 | 26.9 |
| 49 | Après chaque évaluation, je donne des explications supplémentaires aux élèves qui ont des difficultés.  **After each assessment, I give additional explanations to students who are struggling.** | 1313 | .8 | 2.3 | 11.2 | 24.8 | 19.6 | 20.5 | 20.8 |
| 50 | Après chaque évaluation, je conçois des activités de remédiation (mise en place d'une procédure corrective) pour les élèves en difficulté.  **After each assessment, I design remedial activities (set up a corrective procedure) for students in difficulty.** | 1279 | 1.3 | 7.0 | 19.5 | 27.1 | 18.2 | 15.7 | 11.2 |
| 51 | J'adapte les évaluations au niveau scolaire de chaque élève (en proposant des questions différentes ou en modulant mon niveau d'exigence).  **I adapt evaluations to match students’ abilities (by proposing different questions or by modulating my level of requirement).** | 1197 | 1.9 | 5.2 | 17.0 | 21.1 | 18.0 | 17.0 | 19.9 |
| 52 | J'évalue les progrès des élèves faibles.  **I assess the progress of weak students.** | 1232 | .3 | .9 | 5.0 | 29.5 | 19.1 | 19.2 | 26.1 |
| 53 | J'analyse les données relatives aux progrès scolaires des élèves.  **I analyze data about students' academic progress.** | 1129 | 1.1 | 2.8 | 9.7 | 31.5 | 21.7 | 17.8 | 15.4 |
| 54 | J'évalue l'efficacité de mes pratiques pédagogiques (par exemple, en faisant un monitoring des résultats et des progrès réalisés).  **I evaluate the effectiveness of teaching adjustments (e.g. monitor subsequent achievement and progress).** | 1084 | 12.6 | 16.5 | 19.0 | 21.7 | 11.0 | 9.9 | 9.3 |
| 55 | J'utilise les données collectées au sujet des compétences des élèves pour décider des ajustements à opérer au niveau de mon enseignement.  **I use students’ data to make decisions about teaching adjustments.** | 1182 | 1.1 | 2.5 | 11.8 | 25.2 | 22.1 | 18.4 | 19.0 |
| *Management of time* | |  |  |  |  |  |  |  |  |
| 56 | Sur une leçon/activité, le temps disponible est amputé de 5 minutes ou plus, pour des questions d’organisation ou de gestion des comportements.  **During a lesson/activity, the time available is reduced by 5 minutes or more, for organisational or behaviour management reasons.** | 932 | 1.0 | 7.8 | 20.4 | 19.4 | 18.9 | 19.1 | 13.4 |
| 57 | La leçon/activité prévue se termine avec plusieurs minutes d'avance sur ce que j'avais prévu.  **The planned lesson/activity finishes several minutes ahead of schedule.** | 946 | 4.5 | 42.8 | 39.5 | 6.9 | 4.8 | 1.0 | .5 |
| 58 | La leçon/activité dépasse de plusieurs minutes la durée que j'avais prévue.  **The lesson/activity goes on several minutes longer than I had planned.** | 957 | .6 | 10.0 | 42.3 | 19.4 | 15.0 | 9.5 | 3.0 |

Note. 1=never, 2=rarely, 3=sometimes, 4=regularly, 5=frequently, 6=very frequently, 7=systematically.

**Table S2**

*Items of the CSS-T (Reddy et al., 2015) and descriptive statistics*

| Adapted items in French and original items in English | | n | 1 | 2 | 3 | 4 | 5 | 6 | 7 |
| --- | --- | --- | --- | --- | --- | --- | --- | --- | --- |
| *Centration sur l’apprentissage et l’engagement des élèves - Student Focused Learning & Engagement* | | | | | | | | | |
| 1 | Je participe activement aux activités avec les élèves (par exemple, je participe lors des activités pratiques ; je ne reste pas assis.e à mon bureau).  **Actively participates in new activities with students (e.g., takes a turn during “hands-on activities,” does not sit separately at his/her desk).** | 1048 | .1 | .3 | 2.3 | 11.5 | 14.8 | 24.2 | 46.9 |
| 2 | J'attribue aux élèves des rôles ou des tâches spécifiques pendant la leçon ou l'activité d'apprentissage.  **Assigns students roles during lesson or learning activity.** | 1020 | .1 | 2.3 | 13.8 | 22.4 | 23.2 | 20.9 | 17.4 |
| 3 | Je confie aux élèves une tâche ou un projet à réaliser en duo ou en petit groupe.  **Assigns students a task or project to complete with a partner or small group (two or more students).** | 352 | .6 | 4.0 | 13.4 | 18.2 | 21.9 | 23.0 | 19.0 |
| 4 | J'encourage les élèves à participer aux leçons ou aux activités d'apprentissage.  **Encourages students to participate in lessons or learning activities.** | 1046 | .0 | .0 | 1.0 | 10.3 | 14.7 | 24.9 | 49.1 |
| 5 | Je prolonge les discussions collectives ou de groupe sur les concepts et les sujets clés.  **Extends group discussions of key points and topics.** | 330 | .0 | .9 | 4.5 | 17.0 | 25.2 | 30.0 | 22.4 |
| 6 | J'utilise des questions et des activités différentes pour répondre aux besoins d'apprentissage des élèves.  **Uses different questions and activities to accommodate student learning needs.** | 347 | .0 | .3 | 4.3 | 18.2 | 25.4 | 28.8 | 23.1 |
| 7 | Je relie la matière enseignée aux expériences quotidiennes des élèves (par exemple, une leçon sur les fractions peut inclure une discussion sur la façon dont les élèves divisent une pizza).  **Relates subject matter to everyday student experiences (e.g., a lesson on fractions might include a discussion of how the students divide a pizza).** | 335 | .0 | .6 | 6.3 | 16.7 | 22.1 | 25.4 | 29.0 |
| *Façon d’enseigner - Instructional Delivery* | | | | | | | | | |
| 8 | Je change le ton de ma voix pour mettre l'accent sur les concepts et les mots clés.  **Changes tone of voice to emphasize key concepts and words.** | 1038 | .1 | .4 | 2.2 | 8.1 | 14.2 | 24.2 | 50.9 |
| 9 | J'utilise plusieurs méthodes (par exemple, écrire au tableau, utiliser un tableau interactif, Internet, projecteur vidéo) pendant la leçon.  **Uses multiple methods (e.g., writes on board, uses smart board, Internet or overhead projector) during lesson.** | 1011 | .7 | 3.3 | 5.8 | 12.2 | 15.4 | 22.3 | 40.4 |
| 10 | Je résume les principaux concepts enseignés durant la leçon/activité.  **Summarizes major concepts.** | 329 | .3 | 2.4 | 11.9 | 21.0 | 24.9 | 22.5 | 17.0 |
| 11 | Lorsque je parle, je fais des pauses pour souligner les concepts et les mots clés.  **Pauses to emphasize key concepts and words.** | 1021 | .1 | 1.0 | 3.7 | 13.8 | 16.1 | 24.3 | 41.0 |
| 12 | Je montre à la classe comment utiliser les nouveaux concepts ou compétences enseignés.  **Models to class how to use new concepts or skills.** | 327 | .0 | .3 | 5.2 | 17.1 | 25.4 | 28.7 | 23.2 |
| 13 | Je présente une nouvelle activité d'apprentissage ou une nouvelle leçon avant de l'enseigner.  **Introduces new learning activity or lesson before teaching it.** | 322 | .3 | 1.9 | 12.4 | 16.8 | 24.2 | 26.7 | 17.7 |
| 14 | Je relie les nouveaux concepts et leçons aux apprentissages précédents.  **Relates new concepts and lessons to previous learning.** | 334 | .6 | .3 | 7.5 | 19.5 | 23.4 | 29.0 | 19.8 |
| *Promotion de la réflexion des élèves - Promotes Student Thinking* | | | | | | | | | |
| 15 | Je demande aux élèves d'expliquer comment ils sont arrivés à leurs réponses.  **Asks students to describe how they arrived at their answers.** | 1003 | .7 | 1.8 | 9.7 | 16.4 | 20.6 | 27.5 | 23.3 |
| 16 | Je demande aux élèves de résumer ou de répéter les points clés enseignés.  **Asks students to summarize or repeat key points.** | 1012 | .6 | 2.1 | 7.4 | 18.1 | 22.2 | 26.0 | 23.6 |
| 17 | J'encourage les élèves à démontrer une habileté ou à répondre à une question de manière autonome.  **Encourages students to perform a skill or answer a question independently.** | 341 | .0 | 1.2 | 3.2 | 16.1 | 22.9 | 28.7 | 27.9 |
| 18 | Je pose des questions ouvertes aux élèves.  **Asks students open ended questions.** | 351 | .0 | 1.1 | 4.6 | 19.1 | 25.1 | 30.5 | 19.7 |
| 19 | J'encourage les élèves à poser des questions et à réfléchir (brainstorming).  **Encourages students to ask questions and brainstorm ideas.** | 342 | .0 | 1.5 | 8.8 | 15.2 | 22.8 | 29.8 | 21.9 |
| 20 | Je demande aux élèves de développer leurs réponses (en détaillant, en argumentant).  **Asks students to elaborate on their answers.** | 985 | .7 | 2.7 | 11.5 | 19.6 | 23.7 | 23.4 | 18.5 |
| *Feedback sur les performances scolaires - Academic Performance Feedback* | | | | | | | | | |
| 21 | Je souligne devant la classe la contribution positive d'un élève à l'activité ou à la discussion en classe.  **Acknowledges a student’s positive contribution to the class activity or discussion.** | 1008 | .3 | 2.2 | 8.2 | 17.8 | 22.9 | 23.5 | 25.1 |
| 22 | Je dis aux élèves que je suis là pour répondre à leurs questions et les aider.  **Is accessible to students for questions and assistance.** | 354 | .0 | .0 | 2.0 | 7.9 | 11.6 | 23.4 | 55.1 |
| 23 | J'encourage les élèves à vérifier et à corriger leur travail.  **Encourages students to check and correct their work.** | 347 | .6 | .3 | 3.7 | 16.1 | 17.0 | 23.1 | 39.2 |
| 24 | Je souligne les points forts des élèves sur le plan scolaire.  **Acknowledges students’ academic strengths.** | 982 | .6 | 1.1 | 7.2 | 18.7 | 23.8 | 26.9 | 21.6 |
| 25 | Je vérifie que les élèves ont fait leurs tâches en classe ou devoirs à domicile.  **Checks students’ completion of in-class assignments and homework.** | 320 | .0 | .0 | 1.6 | 7.2 | 9.7 | 17.2 | 64.4 |
| 26 | Je fournis un feedback aux élèves sur leur apprentissage ou leur compréhension des principaux concepts enseignés.  **Provides feedback to students on their learning or understanding of key content areas.** | 996 | .2 | 1.5 | 7.1 | 22.3 | 23.3 | 25.2 | 20.4 |
| *Louanges et félicitations – Praise* | | | | | | | | | |
| 27 | J'augmente la fréquence des félicitations lors de l'enseignement de nouvelles compétences.  **Increases frequency of praise when teaching new skills.** | 956 | .9 | 3.2 | 10.8 | 18.9 | 22.8 | 23.6 | 19.7 |
| 28 | Je félicite ou récompense verbalement les élèves qui respectent les règles.  **Verbally praises or rewards students for following rules.** | 1038 | .0 | 1.1 | 6.9 | 18.4 | 19.7 | 23.5 | 30.4 |
| 29 | Je félicite les élèves de manière non verbale (sourires, hochements de tête, clins d'œil, etc.) lorsqu'ils suivent les règles.  **Nonverbally praises students (e.g., smiles, nods, winks) for following rules.** | 356 | .0 | .8 | 5.3 | 8.7 | 14.9 | 26.1 | 44.1 |
| 30 | J'utilise des conséquences positives ou des récompenses en cas de comportement approprié.  **Uses positive consequences or rewards following appropriate behavior.** | 1025 | 2.1 | 6.0 | 12.7 | 14.4 | 18.1 | 17.4 | 29.2 |
| 31 | J'utilise un ton de voix enthousiaste pour féliciter les élèves.  **Uses an enthusiastic tone of voice when issuing praise.** | 357 | .0 | .6 | 2.2 | 9.0 | 13.7 | 29.4 | 45.1 |
| *Feedbacks correctifs - Corrective Feedback* | | | | | | | | | |
| 32 | J'utilise un ton de voix calme mais ferme pour rediriger le comportement de l'élève.  **Uses a calm but firm tone of voice when redirecting student behavior.** | 1044 | .0 | .3 | 3.7 | 16.7 | 21.9 | 29.5 | 27.9 |
| 33 | Je fournis collectivement des feedbacks correctifs aux élèves quant à leurs comportements.  **Provides corrective feedback to students.** | 1007 | .9 | 5.5 | 15.5 | 21.0 | 19.4 | 20.2 | 17.7 |
| 34 | J'utilise des incitations physiques (par exemple, toucher la table ou le cahier de l'élève) pour rediriger le comportement de l'élève.  **Uses physical prompts (e.g., touches student’s desk or paper) to redirect student behavior.** | 342 | 2.6 | 6.7 | 13.7 | 11.7 | 19.6 | 23.4 | 22.2 |
| 35 | Je me rapproche d'un élève pour l'inciter de manière non verbale.  **Moves closer to a student (i.e., - feet) to nonverbally prompt him/her.** | 352 | .9 | 2.6 | 13.6 | 17.3 | 22.4 | 23.6 | 19.6 |
| 36 | Je fournis des feedbacks correctifs spécifiques et en privé aux élèves quant à leurs comportements.  **Provides specific corrective feedback to students privately.** | 344 | .0 | 1.7 | 14.2 | 18.9 | 23.3 | 25.3 | 16.6 |
| 37 | J'utilise des gestes non verbaux pour inciter les élèves à adopter un comportement approprié (par exemple, un doigt sur la lèvre pour obtenir le silence, un doigt sur l'œil pour obtenir un contact visuel, allumer et éteindre les lumières).  **Uses nonverbal gestures to prompt appropriate student behavior (e.g., finger to lip for silence, finger to eye for eye contact, flips lights on and off).** | 1046 | .1 | 1.2 | 6.2 | 14.3 | 17.6 | 23.1 | 37.4 |
| *Gestion préventive - Prevention Management* | |  |  |  |  |  |  |  |  |
| 38 | Je rappelle les règles ou les routines de la classe avant une transition ou une nouvelle activité.  **Reviews classroom rules or routines before a transition or new activity.** | 1025 | 1.4 | 5.6 | 15.7 | 20.8 | 18.2 | 20.5 | 17.9 |
| 39 | Je donne la parole aux élèves qui lèvent la main plutôt qu'aux élèves bruyants.  **Calls on quiet students with their hands raised.** | 1001 | .9 | 2.6 | 7.4 | 9.9 | 14.7 | 24.8 | 39.8 |
| 40 | J'encourage les élèves qui ont des difficultés avec leurs camarades ou avec les tâches scolaires.  **Encourages students struggling with peers or class assignments.** | 351 | .3 | .3 | 2.8 | 11.1 | 21.1 | 33.3 | 31.1 |
| 41 | J'encourage les élèves à se fixer des objectifs comportementaux à court terme (par exemple, rester silencieux pendant la présentation, marcher en file indienne pendant l'exercice d'évacuation).  **Encourages students to set short-term behavioral goals (e.g., remain quiet for the presentation, walk single file for the fire drill).** | 343 | .6 | 3.8 | 13.1 | 14.9 | 20.4 | 24.8 | 22.4 |
| 42 | Je me déplace dans la classe tout en enseignant.  **Moves around the classroom while teaching.** | 1022 | .3 | .8 | 4.0 | 12.9 | 16.5 | 25.9 | 39.5 |
| *Consignes et transitions - Directives/Transitions* | |  |  |  |  |  |  |  |  |
| 43 | Je donne une ou maximum deux consignes à la fois.  **Issues commands one or two steps at a time.** | 350 | .0 | 1.7 | 8.9 | 21.1 | 21.7 | 26.3 | 20.3 |
| 44 | J'obtiens l'attention des élèves avant de donner une consigne.  **Obtains the attention of students before giving an instruction.** | 1041 | .0 | .0 | 2.0 | 9.1 | 13.5 | 26.7 | 48.6 |
| 45 | Les instructions ou les consignes sont spécifiques et formulées sous forme de déclarations, et non de questions.  **Instructions or commands are specific and issued as statements, not questions.** | 336 | .3 | 1.5 | 8.6 | 16.4 | 23.5 | 26.5 | 23.2 |
| 46 | J'aide les élèves à passer d'une tâche à une autre (transitions).  **Helps students transition from one task to another.** | 346 | .0 | .0 | 4.3 | 20.8 | 24.0 | 28.6 | 22.3 |
| 47 | Je fais une pause avant de répéter les instructions ou les consignes aux élèves.  **Pauses before repeating directions or commands to students.** | 342 | .6 | .6 | 8.2 | 18.1 | 24.0 | 26.6 | 21.9 |
| 48 | Après une consigne ou une instruction, j'évalue si tous les élèves s'y conforment ou non.  **Following a command or instruction, assesses for compliance or noncompliance.** | 1012 | .1 | .7 | 3.4 | 13.4 | 18.1 | 29.2 | 35.1 |
| 49 | Je mets en place des routines de classe et des transitions cohérentes pour l'apprentissage.  **Implements consistent classroom routines and transitions for learning.** | 1021 | .1 | .3 | 2.8 | 12.8 | 16.8 | 26.0 | 41.1 |

Note. 1=never, 2=rarely, 3=sometimes, 4=regularly, 5=frequently, 6=very frequently, 7=systematically. R=Reverse coded item.

**Table S3**

*Latent Correlations for the Correlated Factors in ICM-CFA (Above the Diagonal) and Correlated Factors in ESEM (Under the Diagonal) for both instruments*

| DMEE teacher self-report questionnaire on teaching quality – initial version | 1 | 2 | 3 | 4 | 5 | 6 | 7 | 8 |
| --- | --- | --- | --- | --- | --- | --- | --- | --- |
| 1. Orientation | — | .875** | .601** | .718** | .704** | .743** | .735** | — |
| 2. Structuration | -.053 | — | .713** | .781** | .829** | .903** | .858** | — |
| 3. Questioning | .498** | .142** | — | .900** | .756** | .666** | .502** | — |
| 4. Modeling | .468** | .116 | .432** | — | .836** | .697** | .578** | — |
| 5. Application | .539** | -.001 | .516** | .364** | — | .782** | .695** | — |
| 6. Learning environment | -.013 | -.103** | .067 | .084* | .084* | — | .856** | — |
| 7. Assessment | .547** | .340** | .400** | .351** | .333** | -.141** | — | — |
| DMEE teacher self-report questionnaire on teaching quality – final version | 1 | 2 | 3 | 4 | 5 | 6 | 7 | 8 |
| 1. Orientation | — | .817** | .608** | .731** | .612** | .542** | .556** | .399** |
| 2. Structuration | .337** | — | .734** | .796** | .717** | .585** | .608** | .424** |
| 3. Questioning | .457** | .085 | — | .899** | .761** | .732** | .501** | .400** |
| 4. Modeling | .380** | .025 | .364** | — | .813** | .726** | .577** | .453** |
| 5. Application | .491** | .128** | .493** | .311** | — | .677** | .440** | .366** |
| 6. Learning environment | .297** | .034 | .251** | .237** | .307** | — | .601** | .517** |
| 7. Assessment | .511** | .086 | .392** | .302** | .321** | .325** | — | .901** |
| 8. Differentiation | .142** | .097** | .197** | .100** | .112** | .087** | .447** | — |
| CSS-T | 1 | 2 | 3 | 4 | 5 | 6 | 7 | 8 |
| 1. Student Focused Learning & Engagement | — | .882** | .803** | .820** | .793** | .769** | .923** | .854** |
| 2. Instructional Delivery | .593** | — | .814** | .789** | .724** | .775** | .794** | .826** |
| 3. Promotes Student Thinking | .286** | .441** | — | .825** | .651** | .648** | .684** | .720** |
| 4. Academic Performance Feedback | .450** | .570** | .358** | — | .866** | .741** | .782** | .778** |
| 5. Praise | .376** | .409** | .313** | .338** | — | .862** | .868** | .785** |
| 6. Corrective feedback | .526** | .525** | .266** | .431** | .394** | — | .889** | .808** |
| 7. Prevention management | .008 | .016 | .077 | .102 | .061 | .089 | — | .900** |
| 8. Directions/ transitions | .557** | .533** | .377** | .377** | .434** | .497** | -.010 | — |

*Note*. * *p* ≤ .05; ** *p* ≤ .01; CFA: Confirmatory Factor Analysis. ESEM: Exploratory Structural Equation Model.

**Table S4**

*Standardized Factor Loadings (λ) and Uniquenesses (δ) of the Correlated Factors CFA and ESEM Solutions for the initial version of the DMEE teacher self-report questionnaire on teaching quality*

|  |  | CFA | | ESEM | | | | | | | |
| --- | --- | --- | --- | --- | --- | --- | --- | --- | --- | --- | --- |
|  | Items | λ | δ | **1**  (λ) | **2**  (λ) | **3**  (λ) | **4**  (λ) | **5**  (λ) | **6**  (λ) | **7**  (λ) | δ |
| **1. Orientation** | Item 1 | .596** | .645 | **.969**** | .033 | -.036 | -.163** | -.034 | -.044 | -.169** | .367 |
|  | Item 2 | .715** | .488 | **.712**** | -.103* | .118** | -.166** | .082* | .043 | .027 | .384 |
|  | Item 3 | .776** | .397 | **.566**** | -.007 | .099* | .021 | .098* | .104** | .110* | .413 |
|  | Item 4 | .541** | .708 | **.656**** | -.246** | -.075 | .094* | -.014 | -.216** | -.015 | .455 |
|  | Item 5 | .692** | .521 | **.865**** | .031 | -.075 | .083* | .025 | -.044 | -.156** | .348 |
|  | Item 6 | .770** | .407 | **.649**** | -.042 | -.027 | .124** | -.046 | .260** | .153** | .347 |
|  | Item 7 | .773** | .403 | **.699**** | -.097* | .000 | .120* | -.071 | .187** | .119* | .328 |
|  | Item 8 | .922** | .150 | **.045** | .484** | .066 | .055 | .119** | -.205** | .389** | .261 |
| **2. Structuration** | Item 9 | .568** | .677 | .236** | **-.301**** | .172** | -.045 | .280** | -.081* | .169** | .525 |
|  | Item 10 | .685** | .531 | .243** | **-.068** | .196** | .191** | .143** | -.042 | .164** | .510 |
|  | Item 11 | .661** | .563 | .226** | **.164*** | .172** | .211** | .286** | .142** | -.048 | .481 |
|  | Item 12 | .561** | .686 | .207** | **-.434**** | .182** | .031 | .123** | -.266** | .291** | .441 |
|  | Item 13 | .624** | .611 | .220** | **-.354**** | .022 | .325** | .179** | -.148** | .233** | .394 |
|  | Item 14 | .654** | .572 | .235** | **-.265**** | .020 | .429** | .087 | .122** | .143* | .435 |
|  | Item 15 | .554** | .693 | .301** | **-.400**** | .078 | .103* | .095 | -.315** | .196** | .457 |
|  | Item 16 | .766** | .414 | .092* | **.408**** | .046 | .041 | .140** | -.192** | .378** | .350 |
|  | Item 17 | .828** | .314 | .152** | **.487**** | .104** | .091** | -.023 | -.289** | .327** | .228 |
| **3. Questioning** | Item 18 | .756** | .428 | .008 | -.040 | **.732**** | -.031 | .132** | .123** | -.020 | .350 |
|  | Item 19 | .695** | .517 | -.044 | -.031 | **.805**** | -.069* | .017 | .010 | .041 | .393 |
|  | Item 20 | .466** | .783 | .094 | -.118 | **-.081** | -.001 | .624** | -.192** | -.093 | .591 |
|  | Item 21 | .747** | .441 | .105* | -.212** | **.686**** | .077 | -.028 | -.060 | .036 | .392 |
|  | Item 22 | .674** | .546 | .224** | -.030 | **-.013** | .342** | .102 | .358** | .115* | .493 |
|  | Item 23 | .730** | .467 | .031 | -.116 | **.097** | .575** | .139** | .101* | .040 | .453 |
|  | Item 24 | .666** | .556 | -.044 | .095 | **.300**** | .261** | .127* | .291** | .100 | .535 |
| **4. Modeling** | Item 25 | .716** | .487 | .207** | -.028 | .460** | **.091*** | .147** | .103** | -.057 | .474 |
|  | Item 26 | .697** | .514 | .135* | .252** | .167** | **.166**** | .286** | .215** | .028 | .495 |
|  | Item 27 | .680** | .538 | .215** | .164** | .247** | **.093** | .379** | .051 | -.162* | .506 |
|  | Item 28 | .718** | .485 | -.001 | -.224** | .351** | **.334**** | .087* | -.107** | .197** | .471 |
|  | Item 29 | .698** | .513 | .059 | -.201** | .250** | **.642**** | -.051 | .058 | .062 | .323 |
|  | Item 30 | .627** | .606 | .251** | -.083 | -.129** | **.688**** | .049 | .091* | -.077* | .383 |
| **5. Application** | Item 31 | .612** | .625 | -.080 | -.056 | .086* | .102** | **.794**** | .180** | -.070 | .257 |
|  | Item 32 | .523** | .726 | .054 | -.118** | -.121* | -.219** | **.815**** | -.131** | .109 | .376 |
|  | Item 33 | .635** | .597 | .136** | -.227** | -.072 | -.077 | **.730**** | -.255** | .068 | .314 |
|  | Item 34 | .587** | .655 | .104 | -.009 | .297** | .151** | **.232**** | -.184** | -.033 | .625 |
|  | Item 35 | .668** | .554 | -.044 | .105** | .200** | .139** | **.605**** | .164** | -.057 | .369 |
|  | Item 36 | .690** | .523 | .128** | .059 | .221** | .272** | **.377**** | .002 | -.124** | .465 |
|  | Item 37 | .523** | .727 | .033 | .129 | -.070 | -.099 | **.494**** | .440** | .233** | .473 |
|  | Item 38 | .898** | .193 | .225** | .362** | .135** | .044 | **-.056** | -.304** | .346** | .299 |
| **6. Learning environment** | Item 39 | .662** | .562 | .177** | .251** | .248** | .145** | .097* | **.483**** | .119** | .313 |
| Item 40 | .690** | .523 | .171** | .284** | .248** | .148** | .037 | **.342**** | .191** | .392 |
| Item 41 | .407** | .834 | .066 | -.002 | .011 | .223** | .096* | **.228**** | .171** | .762 |
| Item 42 | .731** | .466 | .113 | .146* | .067 | .073 | .325** | **.348**** | .294** | .395 |
| Item 43 | .816** | .333 | .108** | .394** | .026 | .133** | -.012 | **-.274**** | .402** | .306 |
| Item 44 | .851** | .276 | .113** | .415** | .077* | .133** | .051 | **-.185**** | .385** | .285 |
| **7. Assessment** | Item 45 | .560** | .686 | .118* | -.057 | .027 | -.002 | -.002 | .110** | **.528**** | .646 |
|  | Item 46 | .641** | .589 | -.082* | -.135** | .080* | -.011 | .139** | .115** | **.687**** | .514 |
|  | Item 47 | .630** | .603 | .025 | .048 | .135** | -.026 | -.016 | .091** | **.585**** | .562 |
|  | Item 48 | .661** | .563 | .103** | -.193** | -.007 | -.157** | .109** | .262** | **.745**** | .393 |
|  | Item 49 | .694** | .518 | .121** | -.223** | .062 | -.169** | -.018 | .209** | **.809**** | .343 |
|  | Item 50 | .628** | .606 | .170** | -.126** | -.060 | -.082* | -.115** | .065* | **.758**** | .450 |
|  | Item 51 | .769** | .409 | .135** | .415** | .105** | .059 | -.070* | -.330** | **.320**** | .342 |
|  | Item 52 | .805** | .353 | .002 | .195** | .13** | .117** | .010 | -.085* | **.579**** | .358 |
|  | Item 53 | .786** | .382 | -.172** | .104** | .034 | .226** | .158** | -.178** | **.634**** | .342 |
|  | Item 54 | .527** | .722 | .088 | -.065 | -.024 | .083 | .005 | -.248** | **.451**** | .644 |
|  | Item 55 | .809** | .346 | -.050 | .179** | -.008 | .208** | .089** | -.190** | **.593**** | .334 |

*Note*. * *p* ≤ .05; ** *p* ≤ .01; CFA: Confirmatory Factor Analysis. ESEM: Exploratory Structural Equation Model. Target factor loadings are marked in bold.

**Table S5**

*Standardized Factor Loadings (λ) and Uniquenesses (δ) of the Correlated Factors CFA and ESEM Solutions for the final version of the DMEE teacher self-report questionnaire on teaching quality*

|  |  | CFA | |  | ESEM | | | | | | | |
| --- | --- | --- | --- | --- | --- | --- | --- | --- | --- | --- | --- | --- |
|  | Items | λ | δ | **1**  (λ) | **2**  (λ) | **3**  (λ) | **4**  (λ) | **5**  (λ) | **6**  (λ) | **7**  (λ) | **8**  (λ) | δ |
| **1. Orientation** | Item 1 | .679** | .539 | **.913**** | -.046 | -.039 | -.105* | -.010 | -.134** | -.069 | .073* | .365 |
|  | Item 2 | .773** | .402 | **.677**** | .068 | .113** | -.151** | .076 | .009 | .071 | -.038 | .379 |
|  | Item 3 | .841** | .292 | **.525**** | .005 | .076 | .034 | .101* | .060 | .156** | .030 | .413 |
|  | Item 4 | .635** | .597 | **.611**** | .299** | -.075 | .079* | -.019 | -.156** | .008 | .013 | .453 |
|  | Item 5 | .775** | .399 | **.824**** | -.019 | -.092* | .135** | .044 | -.111** | -.064 | .107** | .329 |
|  | Item 6 | .824** | .321 | **.622**** | .041 | .017 | .079 | -.132** | .371** | .058 | -.004 | .299 |
|  | Item 7 | .826** | .318 | **.671**** | .085* | .036 | .091 | -.137* | .258** | .047 | -.014 | .306 |
| **2. Structuration** | Item 9 | .670** | .278 | .185** | **.277**** | .142** | -.035 | .314** | -.147** | .249** | -.143** | .499 |
|  | Item 10 | .760** | .551 | .198** | **.162**** | .154** | .160** | .158** | .027 | .164* | .099 | .508 |
|  | Item 11 | .734** | .422 | .210** | **-.105** | .147** | .219** | .283** | .146** | -.027 | .136* | .479 |
|  | Item 12 | .666** | .461 | .137** | **.553**** | .152** | -.051 | .129** | -.093** | .249** | -.057 | .398 |
|  | Item 13 | .751** | .556 | .185** | **.439**** | .007 | .259** | .152** | -.011 | .198** | -.039 | .389 |
|  | Item 14 | .731** | .436 | .215** | **.212**** | .002 | .408** | .085 | .093* | .184** | -.168** | .432 |
|  | Item 15 | .622** | .466 | .246** | **.520**** | .048 | .036 | .086 | -.114** | .147* | -.001 | .451 |
| **3. Questioning** | Item 18 | .760** | .613 | .016 | -.033 | **.700**** | .011 | .129** | .079** | .020 | -.047* | .348 |
|  | Item 19 | .689** | .350 | -.047 | .037 | **.760**** | -.052 | .019 | .064 | .024 | .054 | .399 |
|  | Item 20 | .478** | .258 | .095 | .305** | **-.023** | -.081 | .502** | .119 | -.234** | .107 | .572 |
|  | Item 21 | .754** | .422 | .107** | .234** | **.674**** | .049 | -.070* | .081** | -.018 | -.008 | .371 |
|  | Item 22 | .678** | .526 | .206** | -.053 | **-.025** | .331** | .102 | .287** | .149** | -.135** | .494 |
|  | Item 23 | .720** | .771 | .030 | .118* | **.060** | .556** | .144** | .097 | .078 | -.043 | .448 |
|  | Item 24 | .657** | .432 | -.063 | -.117 | **.265**** | .262** | .139* | .269** | .114 | -.002 | .531 |
| **4. Modeling** | Item 25 | .720** | .540 | .232** | -.075* | .454** | **.162**** | .108** | -.012 | .035 | -.042 | .445 |
|  | Item 26 | .683** | .481 | .162** | -.299** | .113** | **.229**** | .289** | .048 | .149** | .104* | .448 |
|  | Item 27 | .672** | .569 | .246** | -.185** | .194** | **.158*** | .405** | -.124** | -.010 | .089 | .460 |
|  | Item 28 | .719** | .482 | -.009 | .336** | .336** | **.266**** | .034 | .105** | .103** | .063 | .461 |
|  | Item 29 | .705** | .533 | .066 | .205** | .239** | **.622**** | -.103** | .144** | .042 | -.036 | .298 |
|  | Item 30 | .627** | .549 | .234** | .126* | -.142** | **.643**** | .045 | .150** | -.066 | .004 | .386 |
| **5. Application** | Item 31 | .730** | .483 | -.066 | .005 | .082* | .140** | **.779**** | .045 | .032 | -.152** | .254 |
|  | Item 32 | .599** | .503 | .044 | .316** | -.056 | -.309** | **.654**** | .207** | -.061 | .088 | .356 |
|  | Item 33 | .715** | .607 | .125** | .489** | -.003 | -.202** | **.547**** | .237** | -.180** | .141** | .225 |
|  | Item 34 | .652** | .468 | .086 | .093 | .231** | .182** | **.285**** | -.244** | .066 | .136* | .580 |
|  | Item 35 | .778** | .641 | -.024 | -.188** | .180** | .238** | **.601**** | -.053 | .089* | -.018 | .316 |
|  | Item 36 | .787** | .489 | .129** | .000 | .203** | .298** | **.358**** | -.012 | -.068 | .108** | .461 |
|  | Item 37 | .588** | .574 | .039 | -.232** | -.085 | -.080 | **.491**** | .262** | .294** | -.133* | .470 |
| **6. Learning environment** | Item 39 | .805** | .394 | .130** | -.193** | .204** | .060 | .152** | **.546**** | .049 | .061* | .300 |
| Item 40 | .828** | .381 | .110** | -.100** | .210** | .009 | .068 | **.572**** | .034 | .225** | .320 |
| Item 41 | .506** | .654 | .030 | .107** | -.004 | .113** | .070 | **.445**** | .053 | .004 | .678 |
| Item 42 | .858** | .308 | .080 | -.125* | .043 | .051 | .318** | **.333**** | .275** | .033 | .390 |
| **7. Assessment** | Item 45 | .561** | .351 | .095* | .048 | .007 | -.013 | -.018 | .080 | **.500**** | .019 | .645 |
|  | Item 46 | .643** | .315 | -.089* | .097** | .063 | -.009 | .097* | .051 | **.663**** | -.037 | .514 |
|  | Item 47 | .638** | .744 | -.004 | .017 | .107** | -.056 | -.039 | .138** | **.512**** | .141** | .560 |
|  | Item 48 | .664** | .263 | .092** | .033 | -.021 | -.122** | .075* | .080* | **.769**** | -.194** | .392 |
|  | Item 49 | .697** | .323 | .127** | .027 | .052 | -.113** | -.062 | -.003 | **.837**** | -.178** | .328 |
|  | Item 50 | .632** | .266 | .145** | .100** | -.081* | -.085* | -.142** | .012 | **.715**** | .017 | .449 |
|  | Item 51 | .761** | .685 | .079* | -.014 | .062* | -.004 | -.085** | -.029 | **.156**** | .709** | .342 |
|  | Item 52 | .802** | .586 | -.037 | .032 | .090** | .065* | -.018 | .079** | **.455**** | .412** | .358 |
|  | Item 53 | .784** | .593 | -.187** | .118** | -.001 | .178** | .117** | -.041 | **.524**** | .391** | .339 |
|  | Item 54 | .534** | .559 | .071 | .202** | -.042 | .054 | -.017 | -.161** | **.387**** | .233** | .640 |
|  | Item 55 | .804** | .514 | -.088* | .098** | -.053 | .143** | .071* | -.008 | **.467**** | .465** | .332 |
| **8. Differentiation** | Item 8 | .850** | .600 | -.015 | -.077** | .017 | -.016 | .106** | .074** | .229** | **.696**** | .260 |
|  | Item 16 | .806** | .421 | .028 | -.025 | .005 | -.030 | .117** | .080** | .230** | **.621**** | .350 |
|  | Item 17 | .861** | .357 | .083** | -.035 | .057* | .011 | -.044 | .060** | .144** | **.765**** | .227 |
|  | Item 38 | .832** | .385 | .166** | .007 | .092** | -.014 | -.070* | -.034 | .198** | **.662**** | .297 |
|  | Item 43 | .823** | .715 | .041 | .027 | -.018 | .048 | -.037 | .054* | .224** | **.685**** | .304 |
|  | Item 44 | .857** | .354 | .051 | -.032 | .032 | .063* | .027 | .097** | .228** | **.646**** | .285 |

*Note*. * *p* ≤ .05; ** *p* ≤ .01; CFA: Confirmatory Factor Analysis. ESEM: Exploratory Structural Equation Model. Target factor loadings are marked in bold.

**Table S6**

*Standardized Factor Loadings (λ) and Uniquenesses (δ) of the bifactor ESEM solution for the final version of the DMEE teacher self-report questionnaire on teaching quality*

|  | Items | **G**  (λ) | **S-1**  (λ) | **S-2**  (λ) | **S-3**  (λ) | **S-4**  (λ) | **S-5**  (λ) | **S-6**  (λ) | **S-7**  (λ) | **S-8**  (λ) | δ |
| --- | --- | --- | --- | --- | --- | --- | --- | --- | --- | --- | --- |
| **1. Orientation** | Item 1 | **.484**** | **.594**** | .133** | -.019 | -.167** | -.013 | -.087* | -.020 | .009 | .359 |
|  | Item 2 | **.588**** | **.473**** | .100** | .108** | -.088* | .131** | -.019 | .094* | -.092* | .366 |
|  | Item 3 | **.690**** | **.314**** | .042 | .011 | -.047 | .033 | .024 | .092* | -.027 | .410 |
|  | Item 4 | **.426**** | **.478**** | .287** | -.043 | .114** | .071 | -.194** | .037 | -.024 | .448 |
|  | Item 5 | **.612**** | **.497**** | .111** | -.121** | -.043 | -.059 | -.120** | -.073* | .012 | .326 |
|  | Item 6 | **.646**** | **.419**** | -.027 | -.033 | .165** | .007 | .244** | .114** | -.080* | .299 |
|  | Item 7 | **.643**** | **.478**** | -.012 | .003 | .196** | .018 | .132** | .113* | -.096** | .280 |
| **2. Structuration** | Item 9 | **.569**** | .066* | **.417**** | .034 | -.166** | .059 | -.096** | .019 | -.119** | .442 |
|  | Item 10 | **.673**** | .088* | **.182**** | .030 | .024 | .017 | .002 | .022 | .066 | .500 |
|  | Item 11 | **.700**** | .006 | **-.063** | -.012 | -.052 | .022 | .085* | -.146** | .022 | .474 |
|  | Item 12 | **.489**** | .111** | **.665**** | .093** | .037 | .081* | -.043 | .093** | .014 | .279 |
|  | Item 13 | **.625**** | .160** | **.315**** | -.058* | .230** | .114** | -.118** | .079** | -.065** | .391 |
|  | Item 14 | **.650**** | .108** | **.175**** | -.134** | .205** | -.064 | .005 | -.006 | -.202** | .430 |
|  | Item 15 | **.446**** | .235** | **.546**** | .015 | .068 | .103* | -.058 | .031 | .048 | .426 |
| **3. Questioning** | Item 18 | **.651**** | -.107** | .006 | **.432**** | -.097** | -.050 | .068** | -.114** | -.104** | .338 |
|  | Item 19 | **.564**** | -.110** | .024 | **.511**** | -.040 | -.038 | .044 | -.043 | .013 | .401 |
|  | Item 20 | **.349**** | .102* | .114* | **.034** | .079 | .524** | -.047 | -.127 | -.021 | .554 |
|  | Item 21 | **.597**** | .097** | .080** | **.492**** | .164** | .060 | -.002 | -.011 | -.061** | .351 |
|  | Item 22 | **.618**** | .041 | -.002 | **-.178**** | .064 | -.112* | .228** | -.040 | -.182** | .481 |
|  | Item 23 | **.657**** | -.088* | .073 | **-.141**** | .228** | -.122** | -.003 | -.136** | -.113* | .437 |
|  | Item 24 | **.613**** | -.203** | .018 | **.017** | -.063 | -.169** | .273** | -.119* | -.037 | .460 |
| **4. Modeling** | Item 25 | **.674**** | .079** | -.133** | .261** | **.004** | -.010 | -.087** | -.048 | -.139** | .424 |
|  | Item 26 | **.682**** | -.071 | -.250** | -.053 | **-.121*** | -.059 | -.004 | -.024 | .001 | .446 |
|  | Item 27 | **.663**** | .013 | -.151** | .049 | **-.150**** | .073 | -.171** | -.137** | -.041 | .458 |
|  | Item 28 | **.627**** | .029 | .093** | .198** | **.315**** | .113** | -.052 | .065** | .004 | .439 |
|  | Item 29 | **.681**** | .001 | -.004 | .015 | **.469**** | -.160** | -.041 | -.070* | -.131** | .267 |
|  | Item 30 | **.590**** | .074* | .087* | -.285** | **.326**** | -.152** | .034 | -.205** | -.093 | .376 |
| **5. Application** | Item 31 | **.670**** | -.170** | -.058 | -.046 | -.140** | **.376**** | -.064 | -.176** | -.281** | .242 |
|  | Item 32 | **.398**** | .103** | .107** | .045 | -.066 | **.684**** | .072 | .017 | -.006 | .340 |
|  | Item 33 | **.471**** | .176** | .256** | .077* | .109* | **.669**** | .051 | -.039 | .021 | .212 |
|  | Item 34 | **.563**** | -.030 | .162** | .089* | -.087 | **.007** | -.222** | -.112* | .090* | .570 |
|  | Item 35 | **.717**** | -.211** | -.139** | -.017 | -.187** | **.107** | -.096** | -.170** | -.131** | .320 |
|  | Item 36 | **.688**** | -.019 | -.072* | .047 | .042 | **.116**** | -.114** | -.176** | -.027 | .459 |
|  | Item 37 | **.519**** | -.090 | -.191** | -.140** | -.254** | **.205*** | .223** | .112 | -.176** | .467 |
| **6. Learning environment** | Item 39 | **.672**** | -.037 | -.166** | .041 | -.043 | .018 | **.468**** | -.031 | -.022 | .295 |
| Item 40 | **.640**** | -.018 | -.096** | .077** | .010 | .029 | **.495**** | .015 | .155** | .305 |
| Item 41 | **.410**** | .009 | .016 | -.064* | .159** | .099* | **.340**** | .027 | -.035 | .675 |
| Item 42 | **.695**** | -.058 | -.076 | -.075 | -.135* | .084 | **.285**** | .098 | -.010 | .386 |
| **7. Assessment** | Item 45 | **.448**** | .079* | .034 | -.021 | -.020 | -.024 | .079* | **.366**** | .076** | .645 |
|  | Item 46 | **.524**** | -.034 | .002 | .019 | -.010 | .067 | .019 | **.468**** | .032 | .499 |
|  | Item 47 | **.475**** | -.006 | -.010 | .055 | -.029 | -.034 | .127** | **.397**** | .194** | .558 |
|  | Item 48 | **.538**** | .048 | .095** | -.066* | -.151** | -.035 | .102** | **.513**** | -.086** | .390 |
|  | Item 49 | **.532**** | .087** | .085** | -.003 | -.127** | -.126** | .035 | **.583**** | -.049* | .327 |
|  | Item 50 | **.413**** | .125** | .138** | -.080* | -.038 | -.119** | .035 | **.554**** | .133** | .447 |
|  | Item 51 | **.380**** | .003 | -.014 | .043 | -.001 | -.078* | -.052 | **.214**** | .676** | .342 |
|  | Item 52 | **.565**** | -.047 | -.044 | .029 | .040 | -.043 | .034 | **.367**** | .423** | .358 |
|  | Item 53 | **.554**** | -.096** | -.095** | -.023 | .120** | .080** | -.120** | **.399**** | .402** | .318 |
|  | Item 54 | **.332**** | .174** | .014 | .037 | .130** | .117** | -.215** | **.371**** | .263** | .574 |
|  | Item 55 | **.536**** | -.057* | -.024 | -.065* | .081** | .024 | -.065* | **.368**** | .473** | .334 |
| **8. Differentiation** | Item 8 | **.493**** | -.095** | -.072** | -.015 | -.074** | .014 | .043* | .226** | **.652**** | .259 |
|  | Item 16 | **.503**** | -.055* | -.020 | -.022 | -.065** | .036 | .040 | .223** | **.580**** | .350 |
|  | Item 17 | **.472**** | -.037 | .003 | .010 | -.016 | -.088** | .021 | .191** | **.712**** | .224 |
|  | Item 38 | **.478**** | .098** | -.032 | .082** | .003 | -.025 | -.058* | .248** | **.633**** | .288 |
|  | Item 43 | **.454**** | -.044 | .031 | -.050* | .027 | -.079* | .000 | .242** | **.651**** | .299 |
|  | Item 44 | **.556**** | -.075** | -.005 | -.042 | -.013 | -.082** | .037 | .211** | **.595**** | .277 |

*Note*. * *p* ≤ .05; ** *p* ≤ .01; Target factor loadings are marked in bold.

**Table S7**

*Standardized Factor Loadings (λ) and Uniquenesses (δ) of the Correlated Factors CFA and ESEM Solutions for the CSS-T*

|  |  | CFA | |  | ESEM | | | | | | | |
| --- | --- | --- | --- | --- | --- | --- | --- | --- | --- | --- | --- | --- |
|  | Items | λ | δ | **1**  (λ) | **2**  (λ) | **3**  (λ) | **4**  (λ) | **5**  (λ) | **6**  (λ) | **7**  (λ) | **8**  (λ) | δ |
| **1. Student Focused Learning & Engagement** | Item 1 | .582** | .661 | **.857**** | -.046 | -.069 | -.020 | -.085* | .068 | .000 | -.014 | .346 |
| Item 2 | .623** | .611 | **.554**** | .151** | .094* | .044 | .069 | -.041 | .252** | -.116* | .489 |
| Item 3 | .626** | .608 | **.171**** | .028 | .540** | .013 | .058 | .242** | .076 | -.170** | .486 |
| Item 4 | .811** | .342 | **.584**** | .226** | -.045 | .136** | .112* | -.075 | -.179** | .071 | .234 |
| Item 5 | .786** | .383 | **.250**** | .020 | .313** | .118** | .071 | -.061 | -.042 | .344** | .375 |
| Item 6 | .822** | .324 | **.340**** | .047 | .120** | .136** | .097** | .054 | .032 | .277** | .360 |
| Item 7 | .726** | .473 | **.311**** | .215** | .287** | -.039 | .075 | .029 | .054 | .071 | .475 |
| **2. Instructional Delivery** | Item 8 | .814** | .338 | .170** | **.725**** | -.076* | .012 | -.040 | .092* | -.199** | .010 | .232 |
| Item 9 | .625** | .609 | .149** | **.452**** | .141** | .174** | -.098* | .007 | -.099* | -.088 | .557 |
| Item 10 | .809** | .346 | -.205** | **.531**** | .330** | -.012 | .076 | .045 | .269** | .206** | .241 |
| Item 11 | .799** | .362 | -.034 | **.912**** | -.131** | .108** | -.113** | .099** | -.068 | -.007 | .156 |
| Item 12 | .860** | .261 | .133** | **.424**** | .283** | -.062 | .160** | -.065 | .050 | .202** | .288 |
| Item 13 | .740** | .452 | .093 | **.331**** | .147** | -.067 | .050 | .065 | .224** | .265** | .453 |
| Item 14 | .852** | .274 | .152** | **.285**** | .244** | -.009 | .007 | .015 | .113* | .35** | .321 |
| **3. Promotes Student Thinking** | Item 15 | .799** | .362 | .083* | .167** | **.654**** | .288** | -.108** | .095** | -.083 | -.177** | .241 |
| Item 16 | .853** | .273 | .041 | .294** | **.530**** | .230** | -.141** | .078** | .096* | -.019 | .260 |
| Item 17 | .933** | .130 | .249** | .040 | **.381**** | .067 | .130** | .034 | -.063 | .300** | .236 |
| Item 18 | .843** | .290 | .222** | .222** | **.410**** | .003 | .094** | .149** | .062 | -.034 | .361 |
| Item 19 | .858** | .265 | .217** | .136** | **.501**** | -.014 | .164** | .048 | .019 | .063 | .310 |
| Item 20 | .830** | .311 | .003 | .126** | **.712**** | .291** | -.114** | .047 | .040 | -.039 | .181 |
| **4. Academic Performance Feedback** | Item 21 | .779** | .393 | -.005 | .076* | .095** | **.606**** | .122** | .140** | .070 | -.046 | .339 |
| Item 22 | .806** | .350 | .164** | .288** | .081 | **.201*** | .300** | -.044 | -.281** | .072 | .314 |
| Item 23 | .750** | .438 | -.111* | -.078 | .465** | **.334**** | .228** | .069 | -.222** | .188** | .308 |
| Item 24 | .814** | .338 | .075* | -.020 | -.001 | **.725**** | .107** | .063 | .120 | .071 | .223 |
| Item 25 | .748** | .440 | .028 | .105 | .135 | **.334**** | .095 | -.037 | -.376** | .339** | .326 |
| Item 26 | .832** | .308 | .098** | .110** | .188** | **.508**** | .121** | -.058 | .146** | .083* | .306 |
| **5. Praise** | Item 27 | .796** | .367 | .132** | .034 | -.030 | .334** | **.319**** | .085* | .273** | .086* | .367 |
| Item 28 | .790** | .376 | .109** | -.022 | -.128** | .349** | **.549**** | .129** | .127* | .004 | .290 |
| Item 29 | .823** | .323 | .157** | .107* | .058 | .039 | **.278**** | .316** | -.210** | .106** | .357 |
| Item 30 | .680** | .537 | -.036 | .105** | -.051 | .235** | **.611**** | .068* | .110 | -.072* | .411 |
| Item 31 | .899** | .192 | .283** | .046 | -.019 | .150* | **.275**** | .257** | -.201** | .150** | .247 |
| **6. Corrective Feedback** | Item 32 | .766** | .412 | .004 | .267** | -.001 | .031 | .342** | **.216**** | -.058 | .096* | .460 |
| Item 33 | .613** | .625 | -.152** | .165** | -.039 | .025 | .452** | **.297**** | .161 | .000 | .526 |
| Item 34 | .683** | .533 | -.089 | -.043 | .052 | .032 | -.020 | **.802**** | -.019 | .096 | .351 |
| Item 35 | .639** | .592 | -.027 | -.057 | .002 | .025 | -.224** | **.956**** | -.041 | .075 | .200 |
| Item 36 | .753** | .433 | .080 | .012 | .224** | .036 | .072 | **.304**** | .280** | .182** | .452 |
| Item 37 | .718** | .484 | .078* | .236** | -.053 | -.058 | .235** | **.491**** | -.025 | -.059 | .443 |
| **7. Prevention management** | Item 38 | .561** | .685 | .093* | .053 | -.002 | -.103* | .221** | .338** | **.286**** | .092 | .569 |
| Item 39 | .459** | .789 | .126* | .055 | -.044 | -.058 | .205** | .217** | **-.110** | .109 | .742 |
| Item 40 | .834** | .304 | .289** | -.065 | .093* | .211** | .225** | .165** | **-.039** | .197** | .349 |
| Item 41 | .651** | .576 | .234** | .046 | .060 | -.013 | .303** | .039 | **.227*** | .165** | .535 |
| Item 42 | .629** | .605 | .372** | .038 | -.028 | .004 | -.002 | .210** | **.032** | .176** | .571 |
| **8. Directives/**  **transitions** | Item 43 | .587** | .656 | .135** | .185** | -.277** | .094* | -.241** | .092* | .087 | **.601**** | .426 |
| Item 44 | .741** | .450 | .002 | .155** | .105** | .013 | .074 | .104* | -.175** | **.501**** | .399 |
| Item 45 | .655** | .571 | -.065 | .182** | -.105** | .211** | -.082 | .088* | .061 | **.520**** | .512 |
| Item 46 | .854** | .271 | .124** | .146** | -.042 | .223** | .116** | .048 | .067* | **.427**** | .323 |
| Item 47 | .723** | .477 | .144** | .162** | -.022 | .156** | -.035 | .139** | .167** | **.304**** | .497 |
| Item 48 | .812** | .341 | -.052 | .090* | .109** | .003 | .156** | .091* | -.078 | **.659**** | .242 |
| Item 49 | .801** | .358 | .184** | .056 | .008 | .040 | .030 | .187** | .050 | **.486**** | .349 |

*Note*. * *p* ≤ .05; ** *p* ≤ .01; CFA: Confirmatory Factor Analysis. ESEM: Exploratory Structural Equation Model. Target factor loadings are marked in bold.

**Table S8**

*Standardized Factor Loadings (λ) and Uniquenesses (δ) of the bifactor ESEM Solutions for the CSS-T*

|  | Items | **G**  (λ) | **S-1**  (λ) | **S-2**  (λ) | **S-3**  (λ) | **S-4**  (λ) | **S-5**  (λ) | **S-6**  (λ) | **S-7**  (λ) | **S-8**  (λ) | δ |
| --- | --- | --- | --- | --- | --- | --- | --- | --- | --- | --- | --- |
| **1. Student Focused Learning & Engagement** | Item 1 | **.526**** | **.592**** | .005 | -.091** | -.055 | -.079** | .058 | .028 | .066* | .347 |
| Item 2 | **.560**** | **.354**** | .053 | .117** | -.077 | .201** | -.042 | .062 | -.014 | .492 |
| Item 3 | **.568**** | **.017** | -.060 | .375** | -.065 | .017 | .105* | -.002 | -.180** | .485 |
| Item 4 | **.747**** | **.362**** | .138** | -.131** | .129** | -.138** | -.111** | .064 | -.004 | .223 |
| Item 5 | **.748**** | **.029** | -.093* | .117** | -.010 | -.111* | -.131** | -.126** | .098* | .362 |
| Item 6 | **.775**** | **.148**** | -.042 | .009 | .012 | -.006 | -.017 | -.022 | .120** | .360 |
| Item 7 | **.689**** | **.106*** | .048 | .147** | -.130** | -.011 | -.048 | -.079 | -.026 | .464 |
| **2. Instructional Delivery** | Item 8 | **.697**** | .127** | **.481**** | -.062 | .071* | -.169** | .028 | .050 | .010 | .226 |
| Item 9 | **.535**** | .106** | **.312**** | .155** | .106** | -.062* | -.010 | -.108** | -.038 | .553 |
| Item 10 | **.719**** | -.229** | **.187**** | .306** | -.133** | .165** | -.045 | .052 | .094* | .244 |
| Item 11 | **.672**** | .037 | **.605**** | .007 | .083* | -.018 | .068* | -.022 | .068* | .164 |
| Item 12 | **.797**** | -.033 | **.129**** | .142** | -.104** | -.028 | -.152** | .073 | .017 | .287 |
| Item 13 | **.686**** | -.031 | **.092** | .094* | -.227** | .122* | -.001 | -.103 | .140** | .415 |
| Item 14 | **.780**** | .001 | **.063** | .145** | -.131** | -.013 | -.060* | -.065 | .172** | .312 |
| **3. Promotes Student Thinking** | Item 15 | **.623**** | -.004 | .088** | **.542**** | .183** | -.097** | -.002 | -.059* | -.150** | .241 |
| Item 16 | **.678**** | -.019 | .141** | **.500**** | .072** | .023 | .006 | -.066* | .002 | .260 |
| Item 17 | **.836**** | .041 | -.103** | **.157**** | .014 | -.151** | -.089** | .095* | .046 | .222 |
| Item 18 | **.739**** | .064 | .046 | **.271**** | -.059* | -.004 | .027 | .071 | -.098** | .355 |
| Item 19 | **.767**** | -.003 | -.050 | **.270**** | -.087** | -.051 | -.075* | .003 | -.110** | .308 |
| Item 20 | **.639**** | -.073** | .024 | **.618**** | .146** | -.031 | -.050* | -.020 | -.052* | .176 |
| **4. Academic Performance Feedback** | Item 21 | **.636**** | .021 | .078** | .174** | **.430**** | .250** | .079* | .064 | .025 | .300 |
| Item 22 | **.755**** | .003 | .131** | -.109* | **.186**** | -.126* | -.128** | -.047 | -.127** | .316 |
| Item 23 | **.694**** | -.216** | -.144** | .208** | **.265**** | -.147** | -.070* | .013 | -.092* | .302 |
| Item 24 | **.683**** | .074** | .021 | .096** | **.402**** | .316** | .057 | -.130** | .100* | .227 |
| Item 25 | **.683**** | -.048 | .041 | -.030 | **.330**** | -.301** | -.110* | .037 | .062 | .312 |
| Item 26 | **.718**** | .029 | .034 | .206** | **.243**** | .243** | -.067* | -.091* | .050 | .307 |
| **5. Praise** | Item 27 | **.691**** | .042 | -.061* | -.033 | .069 | **.403**** | .053 | -.072 | .022 | .340 |
| Item 28 | **.691**** | .004 | -.095** | -.193** | .197** | **.354**** | .038 | .109** | -.100** | .289 |
| Item 29 | **.758**** | -.011 | .007 | -.175** | .013 | **-.105** | .146** | -.098* | -.105** | .342 |
| Item 30 | **.602**** | -.127** | -.048 | -.158** | .120** | **.343**** | -.020 | .082** | -.204** | .413 |
| Item 31 | **.821**** | .090** | -.016 | -.237** | .069 | **-.076** | .114** | -.188** | -.055 | .200 |
| **6. Corrective Feedback** | Item 32 | **.708**** | -.100** | .073* | -.162** | -.026 | .045 | **.092*** | -.027 | -.107** | .434 |
| Item 33 | **.535**** | -.178** | -.007 | -.109** | -.002 | .268** | **.140*** | .220** | -.101* | .520 |
| Item 34 | **.567**** | -.059 | -.029 | -.021 | -.006 | -.025 | **.563**** | .015 | .060 | .352 |
| Item 35 | **.511**** | .049 | .022 | .000 | .003 | -.098** | **.718**** | .022 | .130** | .193 |
| Item 36 | **.646**** | -.015 | -.098* | .167** | -.128** | .189** | **.183**** | .005 | .107* | .448 |
| Item 37 | **.634**** | .016 | .106** | -.143** | -.034 | .040 | **.310**** | .122** | -.100** | .442 |
| **7. Prevention management** | Item 38 | **.501**** | .028 | -.056 | .004 | -.118* | .235** | .189** | **.376**** | .090* | .491 |
| Item 39 | **.432**** | .039 | -.015 | -.152** | .090* | -.126** | .067 | **.329**** | -.004 | .652 |
| Item 40 | **.791**** | .086* | -.118** | -.089** | .047 | .038 | .061 | **-.195**** | .009 | .300 |
| Item 41 | **.617**** | .065 | -.103* | -.029 | -.102* | .197** | -.038 | **.144** | .038 | .531 |
| Item 42 | **.568**** | .242** | .002 | -.057* | -.013 | -.043 | .127** | **.124**** | .140** | .562 |
| **8. Directives/**  **transitions** | Item 43 | **.506**** | .141** | .126** | -.158** | -.0200 | -.042 | .093** | -.039 | **.495**** | .426 |
| Item 44 | **.711**** | -.112** | -.001 | -.089* | -.02 | -.229** | -.005 | -.076 | **.170**** | .386 |
| Item 45 | **.575**** | -.033 | .088* | -.043 | .095* | .004 | .050 | .026 | **.369**** | .510 |
| Item 46 | **.769**** | .061 | .024 | -.053 | .119** | .053 | -.017 | .157** | **.257**** | .294 |
| Item 47 | **.640**** | .097** | .064 | .022 | .001 | .111** | .094** | -.007 | **.242**** | .497 |
| Item 48 | **.778**** | -.170** | -.092** | -.081* | -.001 | -.185** | -.055 | .138** | **.275**** | .219 |
| Item 49 | **.746**** | .062* | -.049 | -.081** | -.064 | -.047 | .092* | -.001 | **.265**** | .346 |

*Note*. * *p* ≤ .05; ** *p* ≤ .01; Target factor loadings are marked in bold.
